# Supplementary material for: The Protein-Protein Interaction Network of First Episode Psychosis and Schizophrenia Reveals Possible Trigger Factors and New Drug Targets among Intracellular Signal Transduction Pathways and Neurotoxicity Processes
Source: Preprints.org preprint supplement (doi:10.20944/preprints202107.0596.v1), 2021-07-27
Supplement: Supplementary file 1 [file supplementary]

The protein-protein interaction network of first episode psychosis and schizophrenia reveals possible trigger factors and new drug targets among intracellular signal transduction pathways and neurotoxicity processes.

Michael Maes, M.D., Ph.D. a,b,c, Kitiporn Plaimas, Dr.rer.nat. d, Apichat Suratanee, Dr.rer.nat. e, Cristiano Noto, M.D. f,g, Buranee Kanchanatawan, M.D.  a

a Department of Psychiatry, Faculty of Medicine, Chulalongkorn University, Bangkok, Thailand

b Department of Psychiatry, Medical University of Plovdiv, Plovdiv, Bulgaria

c IMPACT Strategic Research Center, Deakin University, Geelong, Australia

d Advanced Virtual and Intelligent Computing (AVIC) Center, Department of Mathematics and Computer Science, Faculty of Science, Chulalongkorn University, Bangkok, 10330, Thailand

e Department of Mathematics, Faculty of Applied Science, King Mongkut’s University of Technology North Bangkok, Bangkok 10800, Thailand

f GAPi (Early Psychosis Group), Universidade Federal de São Paulo (UNIFESP), São Paulo, Brazil.

g Schizophrenia Program (PROESQ), Department of Psychiatry, Universidade Federal de São Paulo (UNIFESP), São Paulo, Brazil

Corresponding author:

Prof. Dr. Michael Maes, M.D., Ph.D.

IMPACT Strategic Research Center

Barwon Health

Deakin University

Geelong, Vic

Australia

[dr.michaelmaes@hotmail.com](mailto:dr.michaelmaes@hotmail.com)

<https://scholar.google.co.th/citations?user=1wzMZ7UAAAAJ&hl=th&oi=ao>


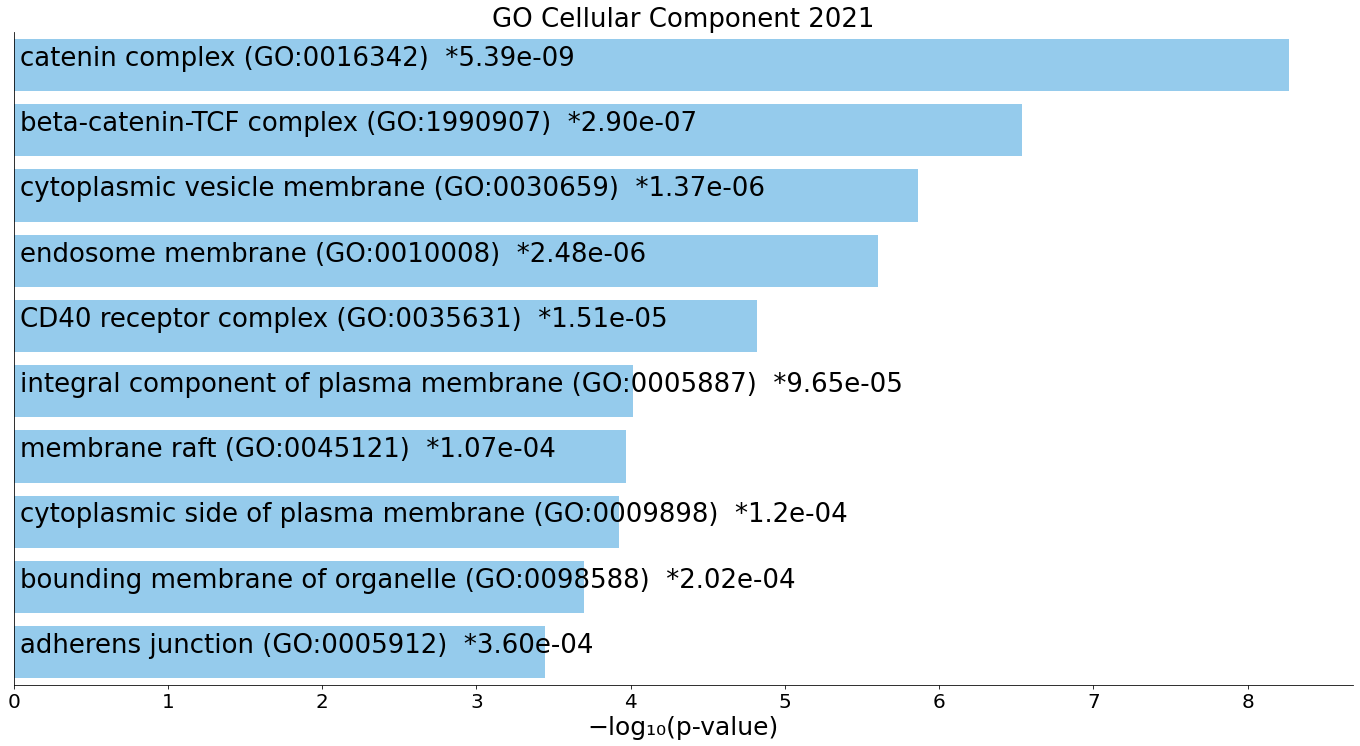


**ESF Figure 1**. Heatmap (top-10) of enriched GO cellular component terms accumulated in the differently expressed proteins in first episode psychosis and schizophrenia.


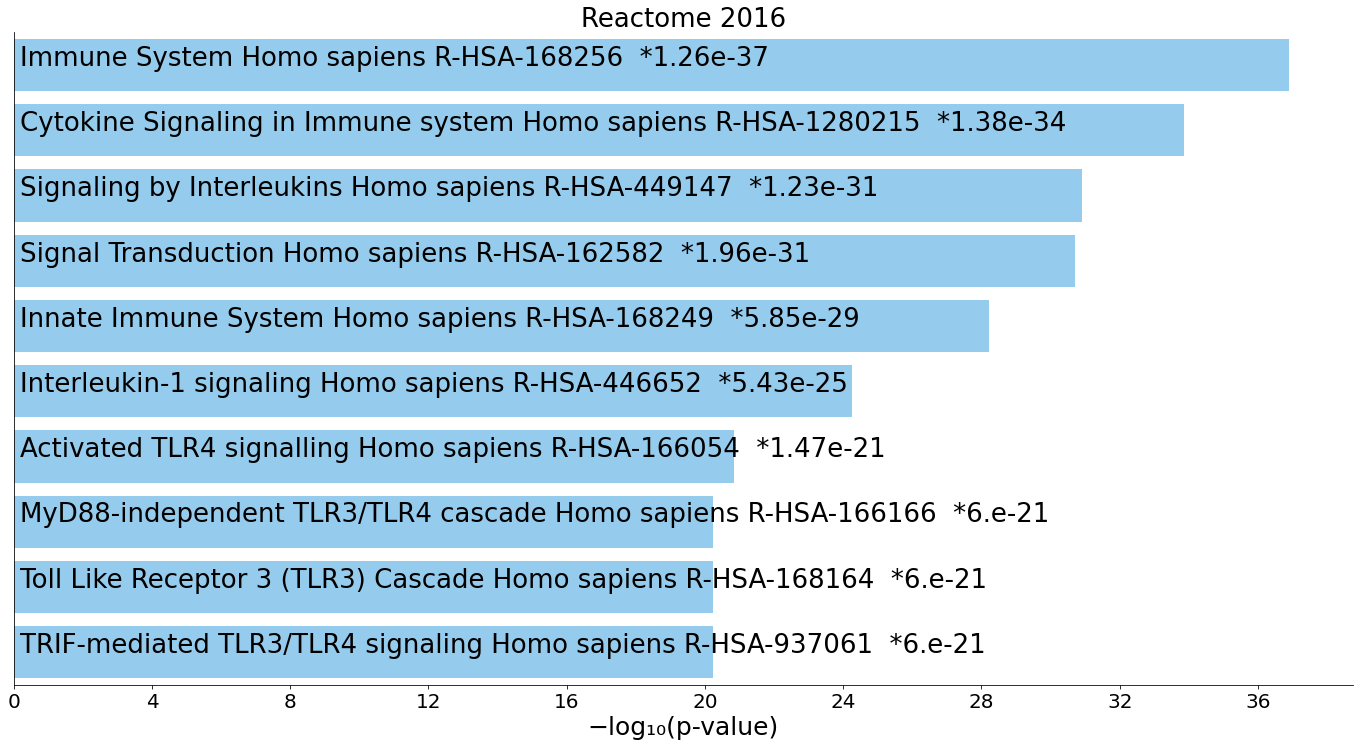


**ESF Figure 2**. Heatmap (top-10) of enriched Reactome terms over-represented in the differently expressed proteins in first episode psychosis and schizophrenia.


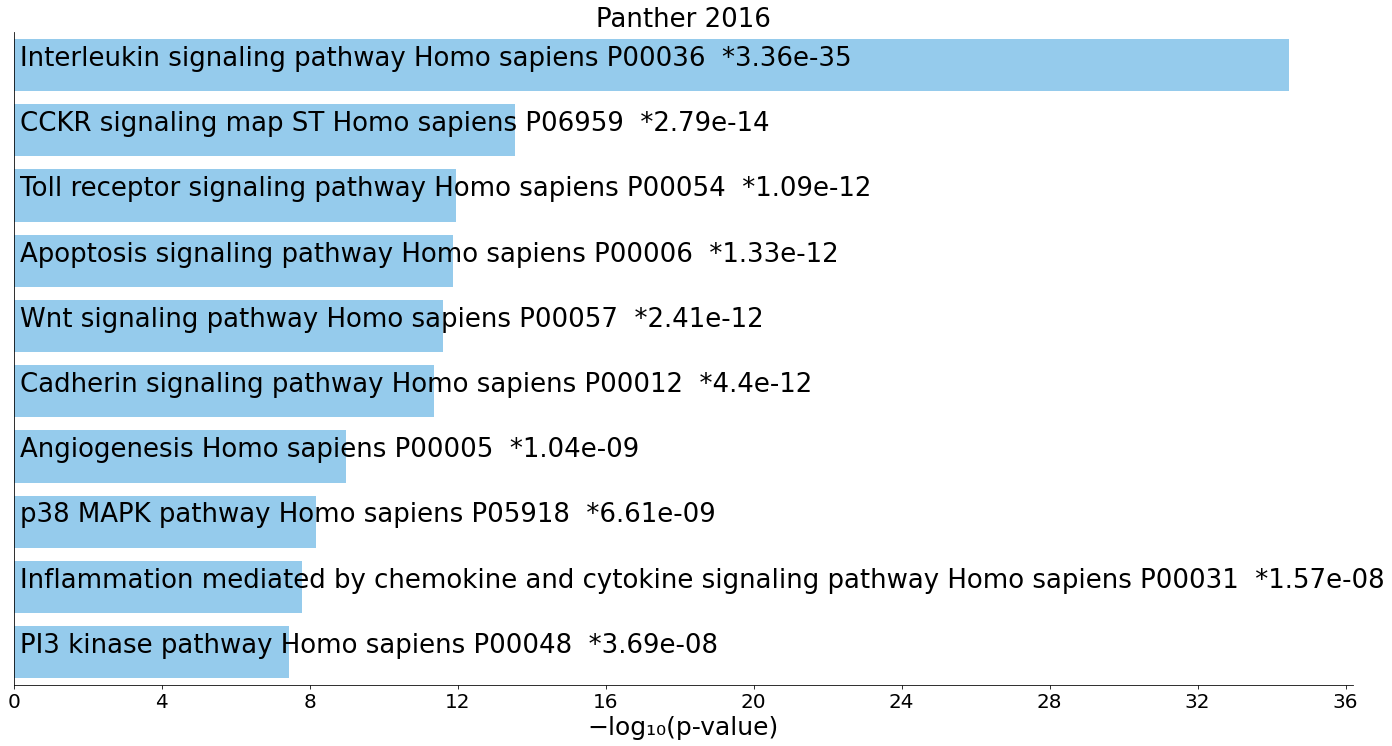


**ESF Figure 3**. Heatmap (top-10) of enriched Panther Pathways that were over-represented in the differently expressed proteins in first episode psychosis and schizophrenia.


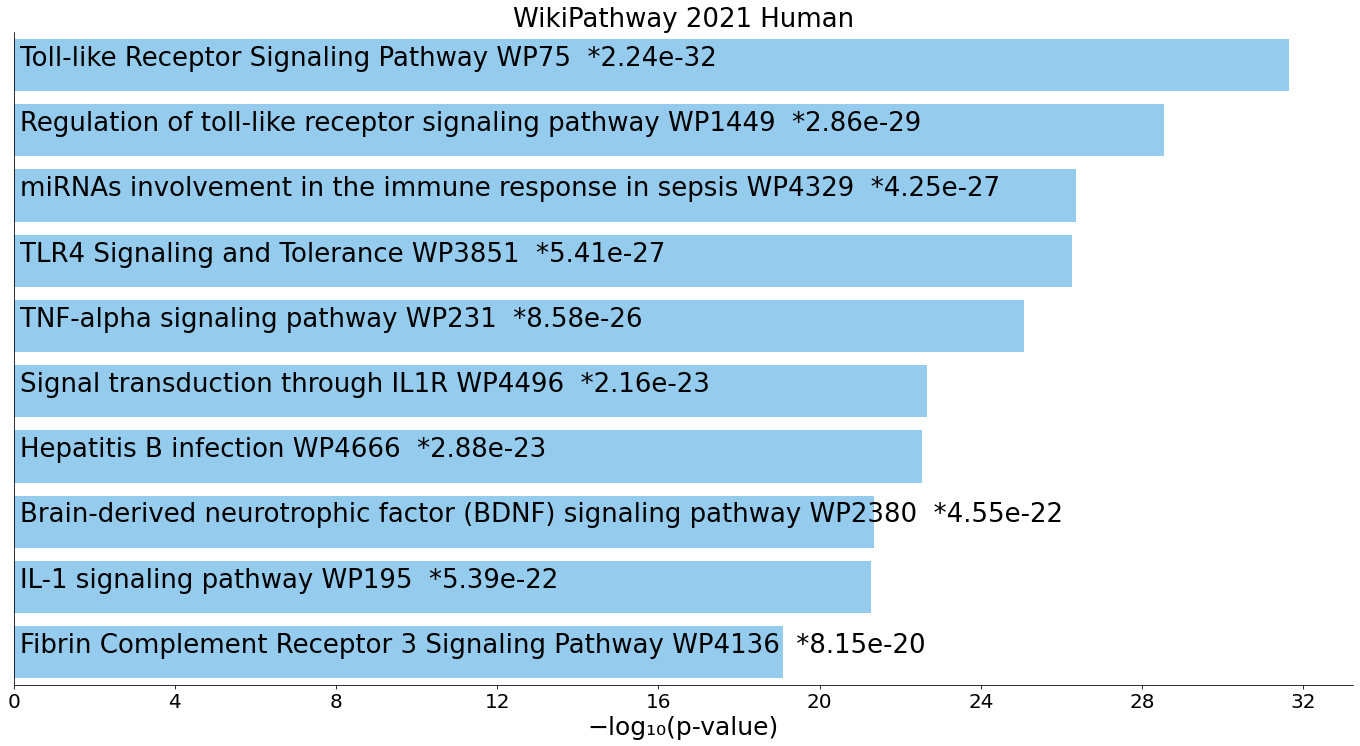


**ESF Figure 4**. Heatmap (top-10) of enriched WikiPathways that were over-represented in the differently expressed proteins in first episode psychosis and schizophrenia.


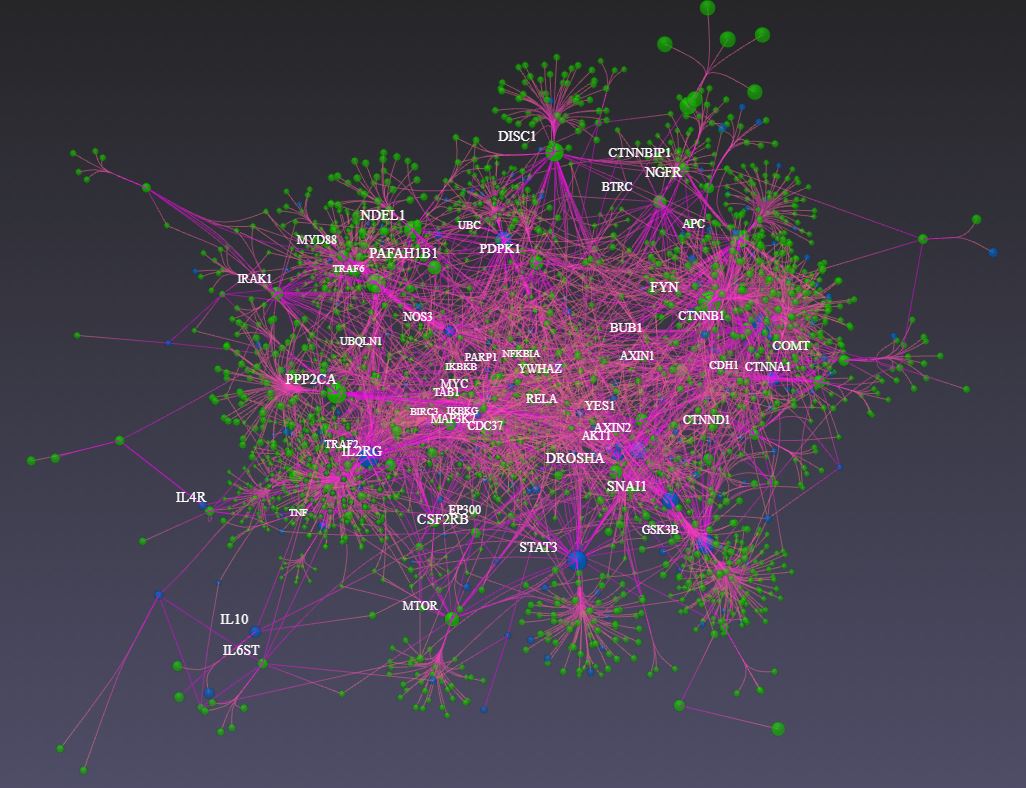


**ESF Figure 5**. Protein-protein interaction network (built with OmicsNet and IntAct) of first episode psychosis and schizophrenia. The top-3 transcriptional factors are shown as blue spots (SP1, NFκB1, and RELA). Proteins in green and bundles in pink.


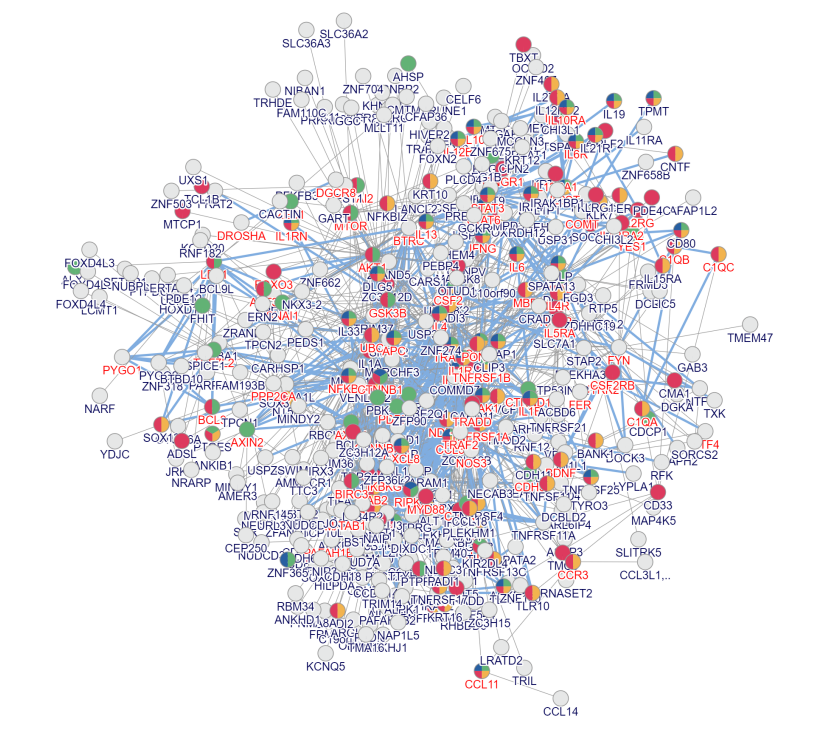


**ESF Figure 6**. Protein-protein interaction network (built with inBio Discover) of differently expressed proteins in first episode psychosis and schizophrenia. Shown are 4 top annotations that are over-represented in the gene list, namely: red color: immune system disease (DOID:2914); blue color: inflammatory bowel disease (DOID:0050589); green color: intestinal disease (DOID:5295); yellow color: autoimmune disease (DOID:417)


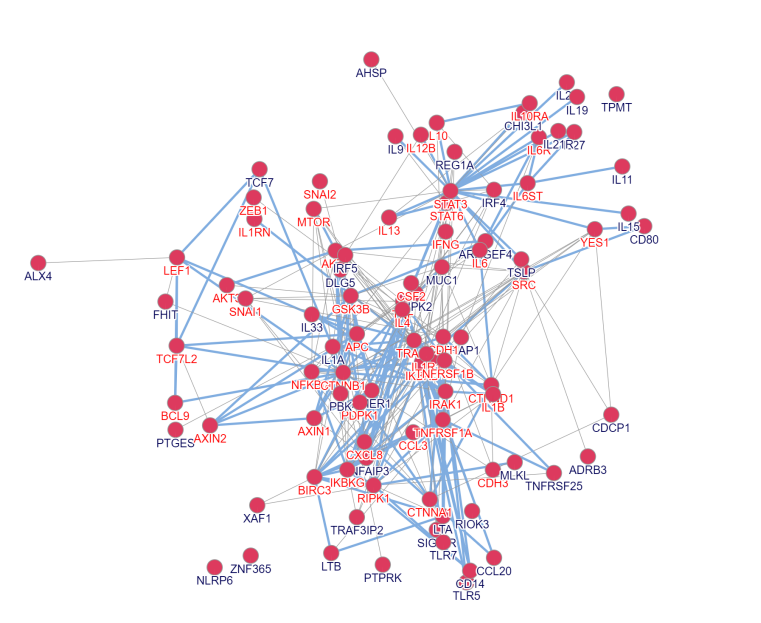


**ESF Figure 7**. Differently expressed proteins in the extended protein-protein interaction network that accumulated in intestinal disease (DOID:5295).


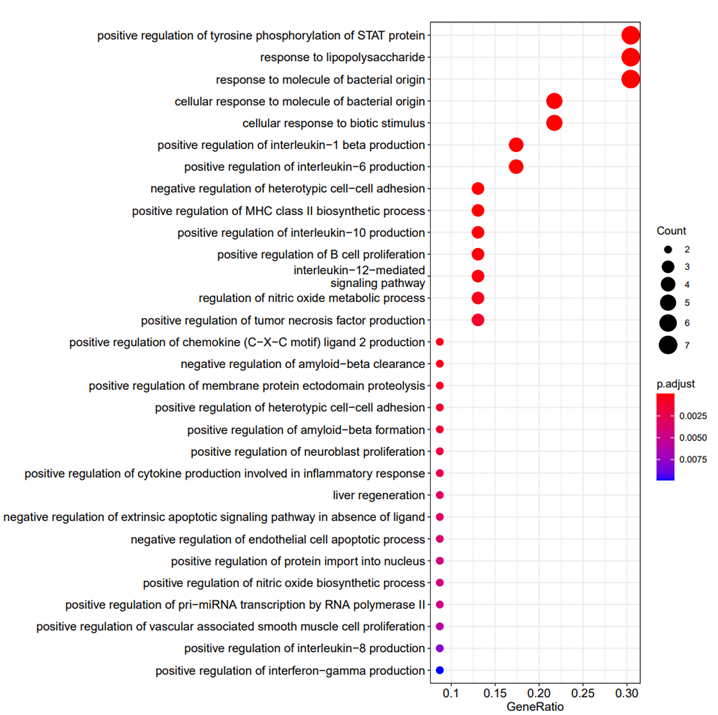


**ESF Figure 8.** GO functional enrichment analysis of all differently expressed proteins in first episode psychosis and schizophrenia using R package ClusterProfiler. Only annotated GO term leaves are shown in this figure. The x-axis shows the gene ratio and the y-axis the annotated GO biological terms. The size of the dots is proportional to the gene number; p-values of all GO terms are colored as indicated in the figure.
